# Supplementary material for: Protective Efficacy and Safety of Three Antimalarial Regimens for the Prevention of Malaria in Young Ugandan Children: A Randomized Controlled Trial
Source: PubMed Central journal article supplement (PMC4122345; doi:10.1371/journal.pmed.1001689), 2014-08-05
Supplement: pmed.1001689.s004.pdf [file pmed.1001689.s004.pdf]

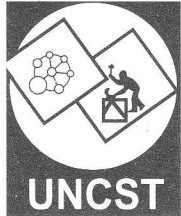

# Uganda National Council for Science and Technology

(Established by Act of Parliament of the Republic of Uganda)

Our Ref: HS 580

5<sup>th</sup> June 2013

Prof Moses Kamya  
MU-UCSF Malaria Research Collaboration  
P O Box 7475  
Kampala

Dear Prof. Kamya,

**RE: RESEARCH PROJECT, "A RANDOMISED CONTROLLED TRIAL OF MONTHLY DIHYDROARTEMISININ-PIPERAQUINE VERSUS MONTHLY SULFADOXINE-PYRIMETHAMINE VERSUS DAILY TRIMETHOPRIM-SULFAMETHOXAZOLE VERSUS NO THERAPY FOR THE PREVENTION OF MALARIA"**

This is to inform you that on 4<sup>th</sup> June 2013, Uganda National Council for Science and Technology (UNCST) reviewed and approved your request to continue with the above study.

The study is valid until 12<sup>th</sup> June 2014. If however, it is necessary to continue with the study beyond the expiry date, a request for continuation should be made to the Executive Secretary, UNCST

Yours sincerely,

Jane Nabbuto

for: Executive Secretary

**UGANDA NATIONAL COUNCIL FOR SCIENCE AND TECHNOLOGY**
